# Supplementary material
Source: PubMed Central journal article supplement (PMC3277650)
Supplement: NIHMS333103-supplement-01.pdf [file NIHMS333103-supplement-01.pdf]

## Appendix A

| <i>Picture Name</i> | <i>FR</i> | <i># Syll</i> | <i># Phon</i> | <i>Semantically-Related Probe</i> | <i>FR</i> | <i># Syll</i> | <i># Phon</i> | <i>Check</i> | <i>FR</i> |
|---------------------|-----------|---------------|---------------|-----------------------------------|-----------|---------------|---------------|--------------|-----------|
| baby                | 7         | 2             | 4             | child                             | 7         | 1             | 4             | mild         | 7         |
| basket              | 7         | 2             | 6             | weave                             | 7         | 1             | 3             | leave        | 7         |
| bed                 | 7         | 1             | 3             | sleep                             | 7         | 1             | 4             | weep         | 7         |
| bell                | 7         | 1             | 3             | ring                              | 7         | 1             | 3             | sing         | 7         |
| bone                | 7         | 1             | 3             | dog                               | 7         | 1             | 3             |              |           |
| book                | 6.91      | 1             | 3             | read                              | 6.83      | 1             | 3             | feed         | 7         |
| bowl                |           | 1             | 3             | dish                              | 7         | 1             | 3             | fish         | 7         |
| bridge              | 6.95      | 1             | 4             | water                             | 7         | 2             | 4             |              |           |
| broom               | 6.92      | 1             | 4             | sweep                             | 6.93      | 1             | 4             | keep         | 7         |
| brush               | 7         | 1             | 4             | hair                              | 7         | 1             | 2             | bear         | 7         |
| bus                 | 7         | 1             | 3             | car                               | 7         | 1             | 2             |              |           |
| camel               | 7         | 2             | 5             | desert                            | 7         | 2             | 5             |              |           |
| cat                 | 7         | 1             | 3             | dog                               | 7         | 1             | 3             | log          | 6.73      |
| cheese              | 7         | 1             | 3             | mouse                             | 7         | 1             | 3             | house        | 7         |
| chest               | 7         | 1             | 4             | hair                              | 7         | 1             | 2             |              |           |
| clock               | 7         | 1             | 4             | time                              | 6.75      | 1             | 3             | lime         | 6.92      |
| comb                | 7         | 1             | 3             | brush                             | 7         | 1             | 4             |              |           |
| desk                | 6.92      | 1             | 4             | chair                             | 7         | 1             | 2             |              |           |
| dragon              | 7         | 2             | 6             | fire                              | 7         | 1             | 3             | hire         | 7         |
| fish                | 7         | 1             | 3             | water                             | 7         | 2             | 3             |              |           |
| flower              | 7         | 2             | 4             | rose                              | 6.83      | 1             | 3             | pose         | 6.92      |
| glove               | 7         | 1             | 4             | hand                              | 7         | 1             | 4             |              |           |
| goat                | 7         | 1             | 3             | milk                              | 6.92      | 1             | 4             |              |           |
| hammock             | 6.92      | 2             | 5             | swing                             | 7         | 1             | 4             | fling        | 6.83      |
| hand                | 7         | 1             | 4             | finger                            | 7         | 2             | 4             |              |           |
| hook                | 6.75      | 1             | 3             | fish                              | 7         | 1             | 3             |              |           |
| hose                | 6.92      | 1             | 3             | water                             | 7         | 2             | 4             | daughter     | 7         |
| map                 | 7         | 1             | 3             | road                              | 7         | 1             | 3             |              |           |
| match               | 7         | 1             | 3             | fire                              | 7         | 1             | 3             |              |           |
| monkey              | 7         | 2             | 5             | ape                               | 7         | 1             | 2             | cape         | 6.92      |
| mountain            | 7         | 2             | 6             | hill                              | 7         | 1             | 3             |              |           |
| mouse               | 7         | 1             | 3             | cat                               | 7         | 1             | 3             | hat          | 7         |
| nail                | 7         | 1             | 3             | hammer                            | 7         | 2             | 4             |              |           |
| net                 | 6.92      | 1             | 3             | fish                              | 7         | 1             | 3             |              |           |
| nose                | 7         | 1             | 3             | face                              | 7         | 1             | 3             | case         | 6.75      |
| pipe                | 7         | 1             | 3             | smoke                             | 7         | 1             | 4             | joke         | 7         |
| pizza               | 7         | 2             | 5             | food                              | 7         | 1             | 3             | mood         | 7         |
| plate               |           | 1             | 4             | dish                              | 7         | 1             | 3             |              |           |
| popcorn             | 7         | 2             | 7             | movie                             | 7         | 2             | 4             |              |           |
| priest              | 7         | 1             | 5             | church                            | 7         | 1             | 3             | perch        | 6.75      |
| rake                | 7         | 1             | 3             | leaves                            | 7         | 1             | 4             |              |           |
| rock                | 6.67      | 1             | 3             | stone                             | 7         | 1             | 4             | phone        | 7         |
| sandwich            | 7         | 2             | 7             | food                              | 7         | 1             | 3             |              |           |
| scissors            | 7         | 2             | 5             | cut                               | 7         | 1             | 3             | hut          | 7         |
| shoe                | 6.92      | 1             | 2             | foot                              | 7         | 1             | 3             |              |           |
| shovel              | 7         | 2             | 5             | dirt                              | 7         | 1             | 3             | hurt         | 7         |
| spider              | 7         | 2             | 5             | web                               | 7         | 1             | 3             |              |           |
| spoon               | 7         | 1             | 4             | fork                              | 7         | 1             | 3             | cork         | 7         |
| tent                | 7         | 1             | 4             | camp                              | 7         | 1             | 4             |              |           |
| thumb               | 7         | 1             | 3             | hand                              | 7         | 1             | 4             |              |           |
| tie                 |           | 1             | 2             | neck                              | 7         | 1             | 3             | deck         | 7         |
| toilet              | 7         | 2             | 5             | bathroom                          | 7         | 2             | 6             |              |           |
| whale               | 7         | 1             | 3             | fish                              | 7         | 1             | 3             |              |           |
| window              | 7         | 2             | 5             | glass                             | 7         | 1             | 4             | bass         | 7         |

Familiarity ratings (FR), word length in syllables (# syll), and word length in phonemes (# phon) for each target picture label (picture name) and Semantically-Related probe word. Also shown is the lexical item used for the word verification (Check) and its familiarity rating; a blank in this space indicates that the probe word was followed by itself for the word verification.

| <b>Picture Name</b> | <b>FR</b> | <b># Syll</b> | <b># Phon</b> | <b>Phonologically-Related Probe</b> | <b>FR</b> | <b># Syll</b> | <b># Phon</b> | <b>Check</b> | <b>FR</b> |
|---------------------|-----------|---------------|---------------|-------------------------------------|-----------|---------------|---------------|--------------|-----------|
| baby                | 7         | 2             | 4             | bailliff                            | 6.75      | 2             | 5             |              |           |
| basket              | 7         | 2             | 6             | bashful                             | 7         | 2             | 6             |              |           |
| bed                 | 7         | 1             | 3             | beg                                 | 7         | 1             | 3             | keg          | 7         |
| bell                | 7         | 1             | 3             | bet                                 | 7         | 1             | 3             | met          | 6.83      |
| bone                | 7         | 1             | 3             | boulder                             | 6.92      | 2             | 5             | older        | 7         |
| book                | 6.91      | 1             | 3             | bushel                              | 7         | 2             | 5             |              |           |
| bowl                |           | 1             | 3             | boast                               | 6.92      | 1             | 4             | roast        | 6.5       |
| bridge              | 6.95      | 1             | 4             | brim                                |           | 1             | 4             | trim         | 6.83      |
| broom               | 6.92      | 1             | 4             | bruise                              | 7         | 1             | 4             |              |           |
| brush               | 7         | 1             | 4             | brunt                               | 5         | 1             | 5             | grunt        | 7         |
| bus                 | 7         | 1             | 3             | bunch                               | 7         | 1             | 4             | hunch        | 6.67      |
| camel               | 7         | 2             | 5             | candid                              | 6.83      | 2             | 6             |              |           |
| cat                 | 7         | 1             | 3             | cab                                 | 7         | 1             | 3             | tab          | 7         |
| cheese              | 7         | 1             | 3             | cheer                               | 7         | 1             | 3             | hear         | 7         |
| chest               | 7         | 1             | 4             | checker                             | 6.92      | 2             | 4             |              |           |
| clock               | 7         | 1             | 4             | clot                                | 7         | 1             | 4             | pot          | 7         |
| comb                | 7         | 1             | 3             | cold                                | 7         | 1             | 4             | mold         | 7         |
| desk                | 6.92      | 1             | 4             | debit                               | 5.75      | 2             | 5             |              |           |
| dragon              | 7         | 2             | 6             | draft                               | 6.83      | 1             | 5             | craft        | 7         |
| fish                | 7         | 1             | 3             | fiddle                              | 6.92      | 2             | 5             | middle       | 6.58      |
| flower              | 7         | 2             | 4             | flounder                            | 6.83      | 2             | 6             |              |           |
| glove               | 7         | 1             | 4             | glutton                             | 6.67      | 2             | 6             |              |           |
| goat                | 7         | 1             | 3             | gold                                | 7         | 1             | 4             | cold         | 7         |
| hammock             | 6.92      | 2             | 5             | handle                              | 7         | 2             | 6             |              |           |
| hand                | 7         | 1             | 4             | hamper                              | 7         | 2             | 5             | damper       | 7         |
| hook                | 6.75      | 1             | 3             | hoof                                | 6.5       | 1             | 3             |              |           |
| hose                | 6.92      | 1             | 3             | hopeful                             | 6.92      | 2             | 6             |              |           |
| map                 | 7         | 1             | 3             | mask                                | 7         | 1             | 4             | flask        | 6.92      |
| match               | 7         | 1             | 3             | magnet                              | 6.75      | 2             | 6             |              |           |
| monkey              | 7         | 2             | 5             | mustard                             | 7         | 2             | 6             |              |           |
| mountain            | 7         | 2             | 6             | mouth                               | 7         | 1             | 3             | south        | 7         |
| mouse               | 7         | 1             | 3             | mound                               | 6.58      | 1             | 4             |              |           |
| nail                | 7         | 1             | 3             | neighbor                            | 7         | 2             | 4             |              |           |
| net                 | 6.92      | 1             | 3             | necklace                            | 7         | 2             | 6             |              |           |
| nose                | 7         | 1             | 3             | note                                | 7         | 1             | 3             | float        | 7         |
| pipe                | 7         | 1             | 3             | pine                                | 6.92      | 1             | 3             | spine        | 7         |
| pizza               | 7         | 2             | 5             | peacock                             | 6.83      | 2             | 5             |              |           |
| plate               |           | 1             | 4             | plague                              | 6.75      | 1             | 4             |              |           |
| popcorn             | 7         | 2             | 7             | posture                             | 7         | 2             | 6             |              |           |
| priest              | 7         | 1             | 5             | preview                             | 7         | 2             | 6             |              |           |
| rake                | 7         | 1             | 3             | racial                              | 7         | 2             | 5             | facial       | 6.83      |
| rock                | 6.67      | 1             | 3             | romp                                | 7         | 1             | 4             |              |           |
| scissors            | 7         | 2             | 5             | simple                              | 7         | 2             | 6             | dimple       | 6.92      |
| shoe                | 6.92      | 1             | 2             | shoots                              |           | 1             | 4             | boots        | 7         |
| shovel              | 7         | 2             | 5             | shutter                             | 7         | 2             | 4             | flutter      | 6.67      |
| spider              | 7         | 2             | 5             | spike                               | 7         | 1             | 4             | like         | 7         |
| spoon               | 7         | 1             | 4             | spooky                              | 7         | 2             | 5             |              |           |
| tent                | 7         | 1             | 4             | temper                              | 7         | 2             | 5             |              |           |
| thumb               | 7         | 1             | 3             | thunder                             | 7         | 2             | 5             |              |           |
| tie                 |           | 1             | 2             | tile                                | 6.92      | 1             | 3             |              |           |
| toilet              | 7         | 2             | 5             | toys                                | 7         | 1             | 4             | boys         | 7         |
| whale               | 7         | 1             | 3             | wait                                | 7         | 1             | 3             | late         | 6.75      |
| window              | 7         | 2             | 5             | whimper                             | 6.75      | 2             | 5             |              |           |

Appendix A (cont'd).

| <i>picture name</i> | <i>FR</i> | <i># Syll</i> | <i># Phon</i> | <i>Unrelated Probe</i> | <i>Check</i> | <i>FR</i> | <i>P-Unrelated Probe</i> | <i>Check</i>   | <i>FR</i> |
|---------------------|-----------|---------------|---------------|------------------------|--------------|-----------|--------------------------|----------------|-----------|
| baby                | 7         | 2             | 4             | sweep                  |              |           | note                     |                |           |
| basket              | 7         | 2             | 6             | ring                   |              |           | mound                    | <i>sound</i>   | 7         |
| bed                 | 7         | 1             | 3             | cut                    |              |           | draft                    |                |           |
| bell                | 7         | 1             | 3             | hair                   | fair         | 7         | spike                    |                |           |
| bone                | 7         | 1             | 3             | time                   |              |           | checker                  | <i>wrecker</i> | 7         |
| book                | 6.91      | 1             | 3             | water                  |              |           | thunder                  | <i>plunder</i> | 5.33      |
| bowl                |           | 1             | 3             | fire                   | liar         | 6.92      | peacock                  |                |           |
| bridge              | 6.95      | 1             | 4             | dog                    | frog         | 7         | pine                     |                |           |
| broom               | 6.92      | 1             | 4             | child                  |              |           | hopeful                  |                |           |
| brush               | 7         | 1             | 4             | mouse                  |              |           | temper                   |                |           |
| bus                 | 7         | 1             | 3             | hair                   |              |           | simple                   |                |           |
| camel               | 7         | 2             | 5             | dish                   |              |           | mask                     |                |           |
| cat                 | 7         | 1             | 3             | rose                   |              |           | racial                   |                |           |
| cheese              | 7         | 1             | 3             | hand                   | land         | 6.92      | romp                     | <i>chomp</i>   |           |
| chest               | 7         | 1             | 4             | car                    | far          | 6.58      | whimper                  |                |           |
| clock               | 7         | 1             | 4             | water                  |              |           | brim                     |                |           |
| comb                | 7         | 1             | 3             | fish                   | wish         | 6.92      | shoots                   |                |           |
| desk                | 6.92      | 1             | 4             | water                  |              |           | bunch                    |                |           |
| dragon              | 7         | 2             | 6             | chair                  | stair        | 7         | bet                      |                |           |
| fish                | 7         | 1             | 3             | road                   | load         | 6.7       | preview                  |                |           |
| flower              | 7         | 2             | 4             | weave                  |              |           | spooky                   | <i>kooky</i>   |           |
| glove               | 7         | 1             | 4             | ape                    |              |           | neighbor                 | <i>labor</i>   | 7         |
| goat                | 7         | 1             | 3             | leaves                 | sleeves      | 7         | shutter                  |                |           |
| hammock             | 6.92      | 2             | 5             | desert                 |              |           | plague                   | <i>vague</i>   | 7         |
| hand                | 7         | 1             | 4             | sleep                  |              |           | boast                    |                |           |
| hook                | 6.75      | 1             | 3             | swing                  |              |           | sandal                   |                |           |
| hose                | 6.92      | 1             | 3             | food                   |              |           | glutton                  | <i>mutton</i>  |           |
| map                 | 7         | 1             | 3             | fish                   |              |           | flounder                 | <i>pounder</i> | 7         |
| match               | 7         | 1             | 3             | fish                   |              |           | hoof                     |                |           |
| monkey              | 7         | 2             | 5             | hill                   | bill         | 7         | debit                    |                |           |
| mountain            | 7         | 2             | 6             | finger                 | linger       | 6.67      | toys                     |                |           |
| mouse               | 7         | 1             | 3             | fire                   |              |           | handle                   | <i>sandal</i>  | 6.58      |
| nail                | 7         | 1             | 3             | smoke                  |              |           | brunt                    |                |           |
| net                 | 6.92      | 1             | 3             | face                   |              |           | mustard                  | <i>custard</i> | 6.75      |
| nose                | 7         | 1             | 3             | read                   |              |           | wait                     |                |           |
| pipe                | 7         | 1             | 3             | cat                    |              |           | bashful                  |                |           |
| pizza               | 7         | 2             | 5             | dog                    |              |           | necklace                 |                |           |
| plate               |           | 1             | 4             | movie                  | groovy       | 7         | bushel                   |                |           |
| popcorn             | 7         | 2             | 7             | church                 |              |           | bruise                   | <i>cruise</i>  | 7         |
| priest              | 7         | 1             | 5             | food                   |              |           | tile                     | <i>pile</i>    | 7         |
| rake                | 7         | 1             | 3             | bathroom               |              |           | cold                     |                |           |
| rock                | 6.67      | 1             | 3             | foot                   |              |           | fiddle                   |                |           |
| sandwich            | 7         | 2             | 7             | hammer                 | slammer      | 6.92      | posture                  |                |           |
| scissors            | 7         | 2             | 5             | milk                   |              |           | candid                   | <i>landed</i>  | 6.58      |
| shoe                | 6.92      | 1             | 2             | stone                  |              |           | bailliff                 |                |           |
| shovel              | 7         | 2             | 5             | neck                   |              |           | cab                      |                |           |
| spider              | 7         | 2             | 5             | hand                   |              |           | magnet                   |                |           |
| spoon               | 7         | 1             | 4             | web                    |              |           | clot                     |                |           |
| tent                | 7         | 1             | 4             | dish                   |              |           | gold                     |                |           |
| thumb               | 7         | 1             | 3             | glass                  |              |           | boulder                  |                |           |
| tie                 |           | 1             | 2             | dirt                   |              |           | mouth                    |                |           |
| toilet              | 7         | 2             | 5             | fork                   |              |           | beg                      |                |           |
| whale               | 7         | 1             | 3             | camp                   |              |           | hamper                   |                |           |
| window              | 7         | 2             | 5             | brush                  | crush        | 7         | cheer                    |                |           |

Appendix A (cont'd).
